# Supplementary material for: Changes in the nutrients of camels’ milk alter the functional features of the intestine microbiota
Source: Royal Society of Chemistry journal article supplement (doi:10.1039/c8fo00812d), 2018-01-01
Supplement: c8fo00812d2.xlsx [file c8fo00812d2.xlsx]

## Sheet: Sheet1
Estimators	HM-Mean	HM-Sd	CW-Mean	CW-Sd	LM-Mean	LM-Sd	Pvalue(HM-CW)	Qvalue(HM-CW)	Pvalue(HM-LM)	Qvalue(HM-LM)	Pvalue(CW-LM)	Qvalue(CW-LM)
sobs	262.75	12.384	287.88	9.2341	247.75	15.591	0.001918	0.01151	0.0829	0.1658	0.000931	0.004078
shannon	3.3479	0.12825	3.8583	0.23394	3.1727	0.18909	0.003876	0.01163	0.04057	0.1217	0.001359	0.004078
simpson	0.094496	0.016424	0.051373	0.031918	0.12748	0.035082	0.01359	0.02717	0.04057	0.1217	0.005385	0.01077
ace	304.03	14.709	318.84	14.794	293.52	19.099	0.04057	0.06085	0.2701	0.3242	0.01359	0.0163
