# Supplementary material for: Changes in the nutrients of camels’ milk alter the functional features of the intestine microbiota
Source: Royal Society of Chemistry journal article supplement (doi:10.1039/c8fo00812d), 2018-01-01
Supplement: c8fo00812d3.xlsx [file c8fo00812d3.xlsx]

## Sheet: Sheet1
	NMDS1	NMDS2
HM1	-0.1044	-0.1397
HM2	-0.1715	-0.0733
HM3	-0.1933	-0.1445
HM4	-0.0795	-0.0894
HM5	-0.0774	-0.1009
HM6	-0.0661	-0.2164
HM7	0.0067	-0.037
HM8	-0.1242	-0.1824
LM1	-0.114	0.1712
LM2	-0.1007	0.1536
LM3	-0.0538	0.1112
LM4	-0.254	0.0859
LM5	-0.239	0.1492
LM6	-0.0825	0.0671
LM7	-0.1734	0.0917
LM8	-0.0758	0.1029
CW1	0.2146	-0.0996
CW2	0.2314	-0.037
CW3	0.275	0.0062
CW4	0.2335	-0.0095
CW5	0.1986	-0.0214
CW6	0.2467	0.0373
CW7	0.2332	0.0209
CW8	0.2699	0.1541
