# Supplementary material for: Changes in the nutrients of camels’ milk alter the functional features of the intestine microbiota
Source: Royal Society of Chemistry journal article supplement (doi:10.1039/c8fo00812d), 2018-01-01
Supplement: c8fo00812d4.xlsx [file c8fo00812d4.xlsx]

## Sheet: Sheet1
	Proportion of Variance
PC1	0.4862
PC2	0.2239
PC3	0.0885
PC4	0.04
PC5	0.0343
PC6	0.0236
PC7	0.015
PC8	0.0147
PC9	0.0115
PC10	0.0088
PC11	0.0067
PC12	0.0059
PC13	0.0032
PC14	0.0028
PC15	0.0018
PC16	0.0011
PC17	0.0002
PC18	0
PC19	0.0007
PC20	0.0017
PC21	0.0041
PC22	0.0053
PC23	0.0068
PC24	0.013
