# Supplementary material for: Changes in the nutrients of camels’ milk alter the functional features of the intestine microbiota
Source: Royal Society of Chemistry journal article supplement (doi:10.1039/c8fo00812d), 2018-01-01
Supplement: c8fo00812d7.xlsx [file c8fo00812d7.xlsx]

## Sheet: Sheet1
	Protein	Lactose	Amino_acid
g__Akkermansia	-0.008	-0.034	0.036
g__Faecalibaculum	-0.233	-0.373	-0.359
g__Bifidobacterium	0.678	0.857	0.788
g__Romboutsia	-0.309	-0.056	-0.108
g__Parasutterella	0.657	0.712	0.756
g__Roseburia	-0.53	-0.451	-0.474
g__Desulfovibrio	-0.514	-0.373	-0.458
g__Lactobacillus	0.57	0.68	0.675
g__Alistipes	-0.384	-0.335	-0.31
g__Erysipelatoclostridium	-0.543	-0.378	-0.498
g__Turicibacter	0.367	0.629	0.518
g__Parvibacter	-0.462	-0.418	-0.509
g__Odoribacter	-0.153	-0.096	-0.069
g__Enterorhabdus	-0.115	0.02	-0.086
g__Lachnoclostridium	-0.435	-0.289	-0.461
g__Anaerotruncus	-0.271	-0.001	-0.032
g__Ruminiclostridium	-0.449	-0.391	-0.349
g__Oscillibacter	-0.562	-0.604	-0.647
g__Tyzzerella	-0.542	-0.532	-0.578
g__Blautia	0.175	0.245	0.145
g__Mucispirillum	-0.036	-0.147	-0.144
g__Pseudoalteromonas	0.334	0.2	0.169
g__Marvinbryantia	-0.212	-0.186	-0.237
g__Gordonibacter	-0.382	-0.377	-0.465
g__Alcanivorax	0.065	0.268	0.267
g__Sarcina	-0.028	0.019	0.021
g__Catenibacterium	-0.163	-0.162	-0.058
g__Anaeroplasma	0.381	0.577	0.522
g__Streptococcus	0.042	0.374	0.316
g__Eisenbergiella	-0.315	-0.413	-0.477
g__Parvibaculum	0.346	0.601	0.601
g__Nocardioides	0.266	0.452	0.477
g__Psychrobacter	0.466	0.333	0.466
g__Marinobacter	-0.183	-0.001	0.03
g__Rhodococcus	0.066	0.028	0.049
g__Sulfitobacter	0.169	0.145	0.148
g__Algiphilus	0.125	0.317	0.295
g__Megasphaera	-0.045	-0.098	-0.116
g__Erythrobacter	0.328	0.154	0.32
g__Collinsella	-0.194	-0.28	-0.203
g__Holdemanella	-0.313	-0.387	-0.321
g__Butyricicoccus	-0.033	-0.132	-0.165
g__Fusobacterium	-0.098	-0.116	-0.098
g__Croceibacter	0.175	0.419	0.487
g__Planktomarina	-0.244	-0.211	-0.211
