# Supplementary figures and images for: Changes in the nutrients of camels’ milk alter the functional features of the intestine microbiota
Source: Royal Society of Chemistry journal article supplement (doi:10.1039/c8fo00812d), 2018-01-01

Samples distances heatmap on OTU level

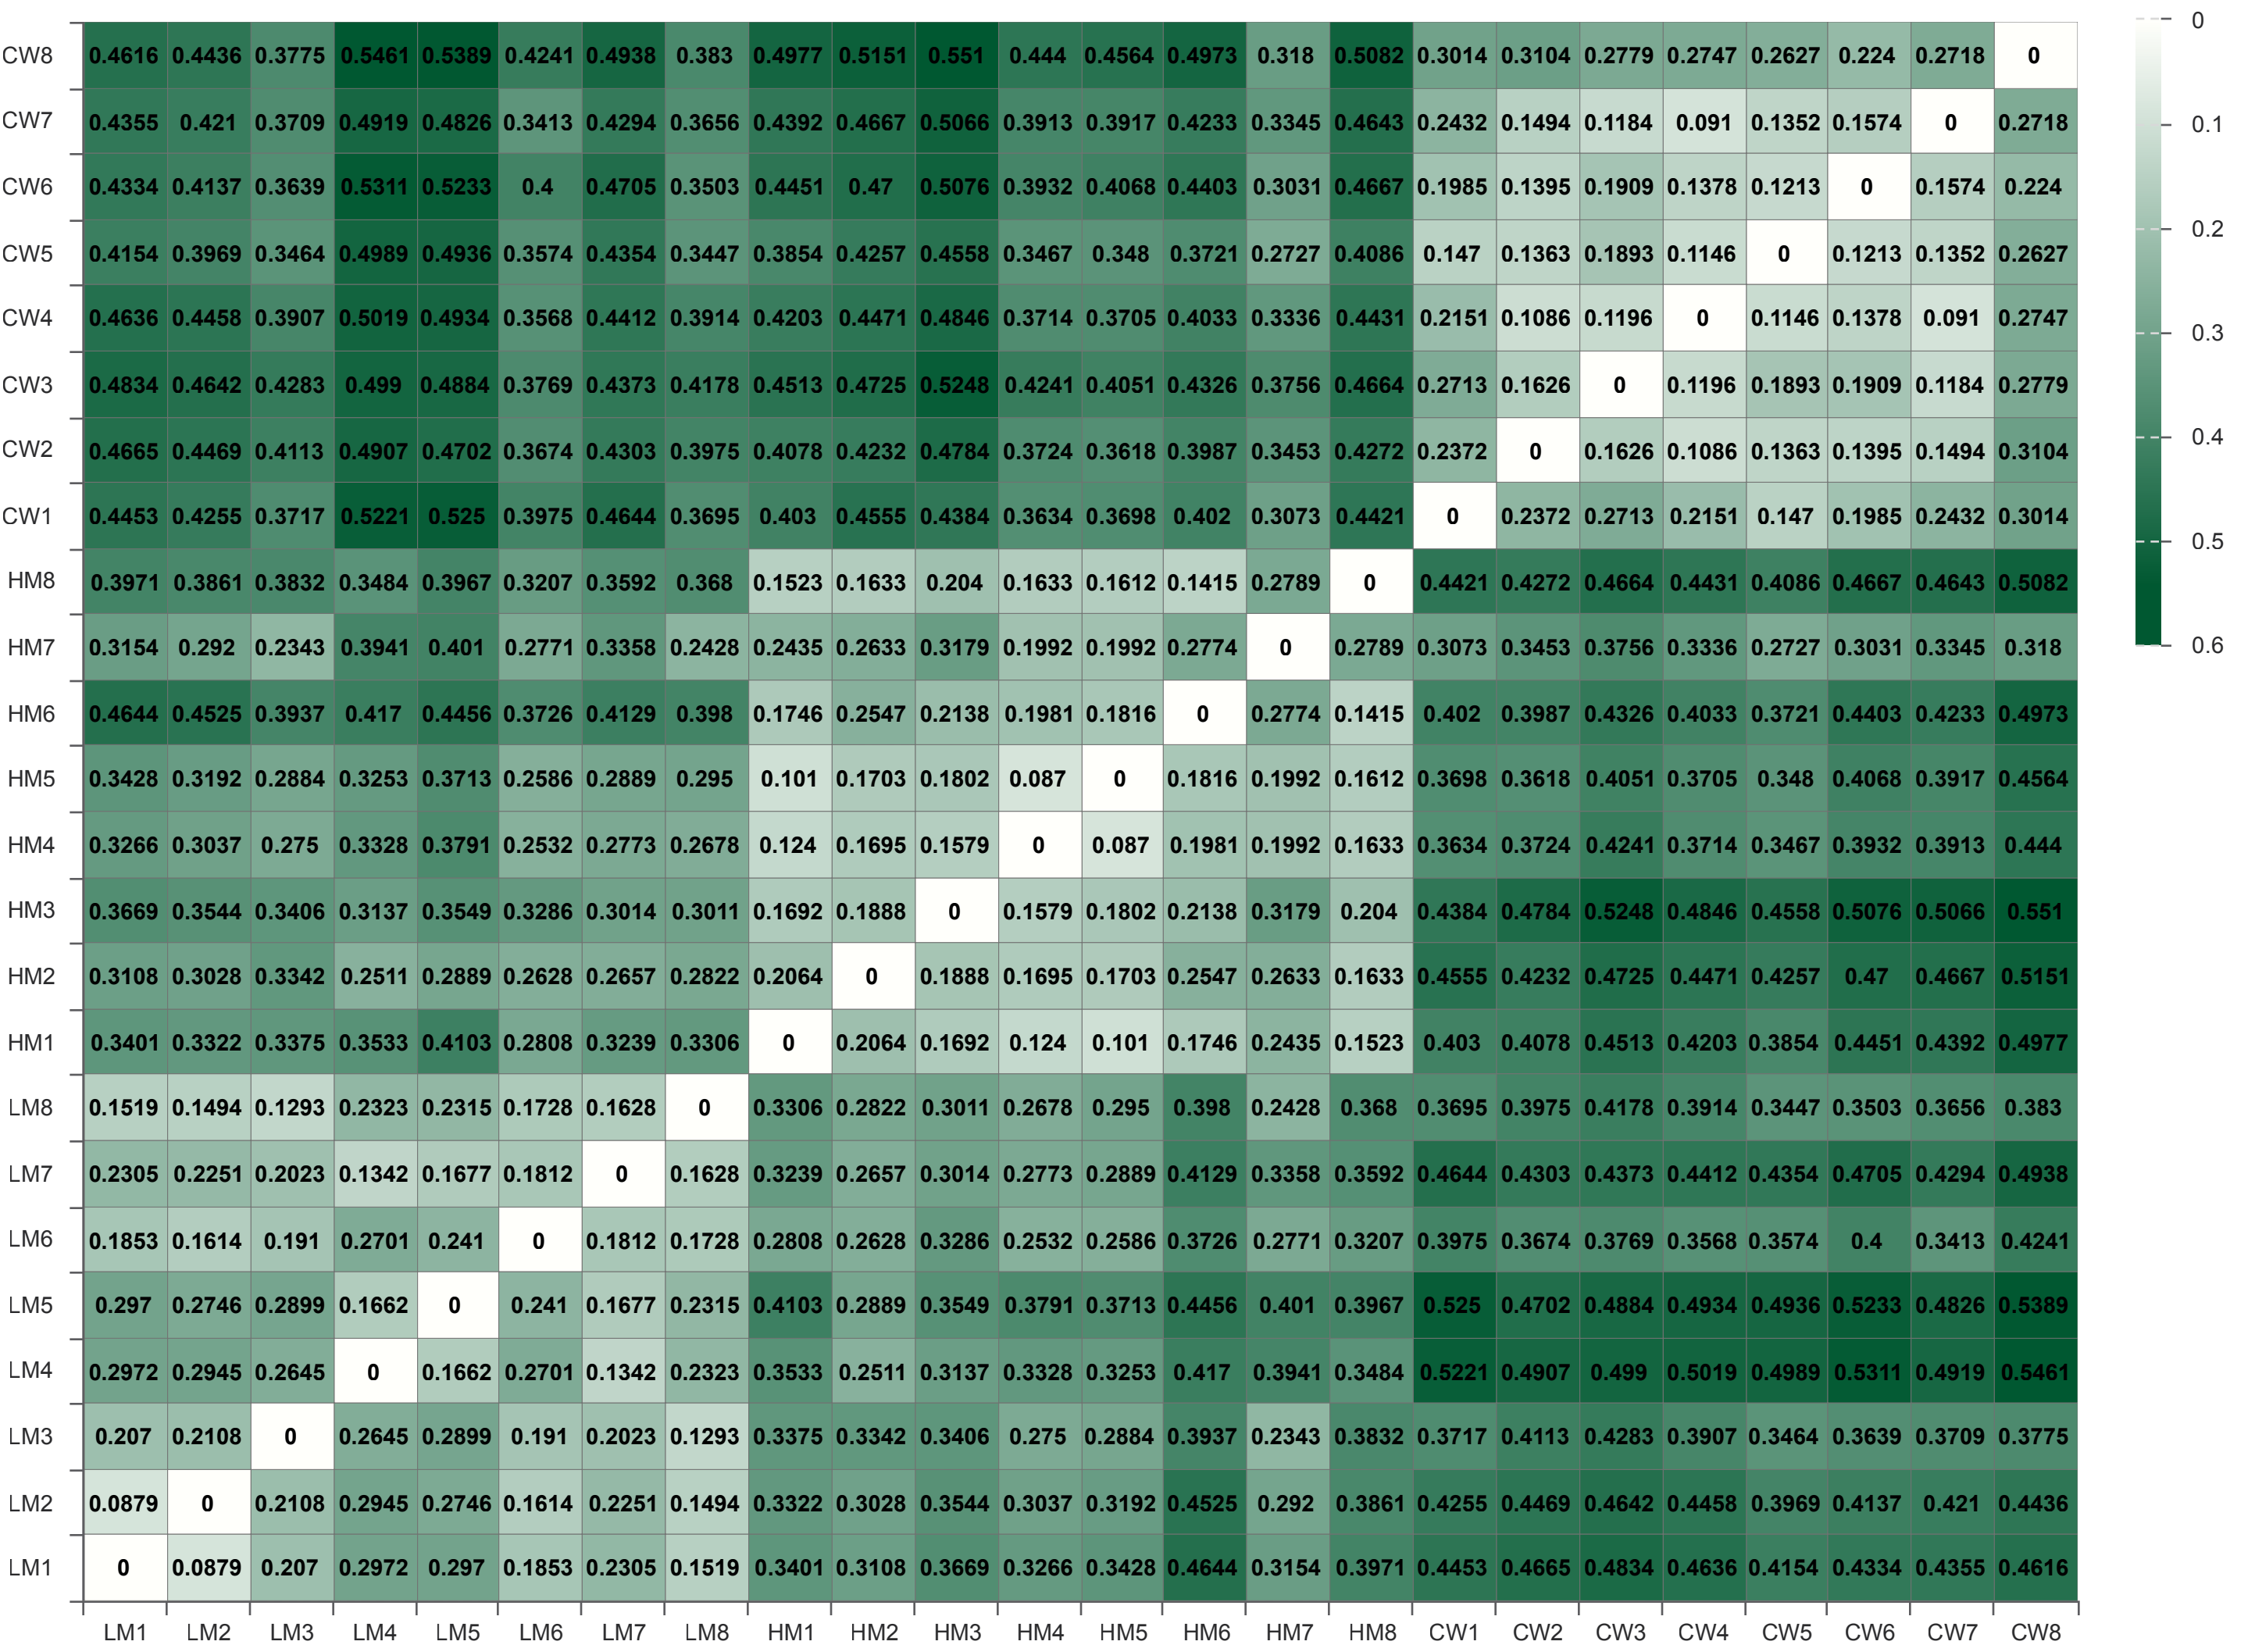

Supplement: c8fo00812d5.pdf [file c8fo00812d5.pdf]
